# Supplementary material for: Requirement for integrin-linked kinase in neural crest migration and differentiation and outflow tract morphogenesis
Source: PubMed Central journal article supplement (PMC3906977; doi:10.1186/1741-7007-11-107), 2013-10-16
Supplement: 1741-7007-11-107-S2.pdf [file 1741-7007-11-107-S2.pdf]

## Additional file 2

**Table S1: Microarray analysis of neural crest cells from the OFT of control and ILK mutant embryos at E10.5**

| gene                                       | description                                                                | ctrl signal | FC(mut/ctrl) |      |
|--------------------------------------------|----------------------------------------------------------------------------|-------------|--------------|------|
|                                            |                                                                            |             | Microarray   | qPCR |
| <b>muscle differentiation</b>              |                                                                            |             |              |      |
| Myog                                       | myogenin                                                                   | 449.7       | 0.667        | 0.23 |
| Scx                                        | scleraxis                                                                  | 318.6       | 0.659        | 0.65 |
| Zfp874                                     | zinc finger protein 874                                                    | 164.8       | 0.656        |      |
| Xist   Xist                                | inactive X specific transcripts                                            | 1038        | 0.652        |      |
| Neb                                        | nebulin                                                                    | 78.82       | 0.638        |      |
| Nppa                                       | natriuretic peptide precursor type A                                       | 629.8       | 0.621        |      |
| <b>heart and outflow tract development</b> |                                                                            |             |              |      |
| Gp1bb                                      | glycoprotein Ib, beta polypeptide                                          | 73.1        | 1.5          | 1.93 |
| Sall4                                      | sal-like 4 (Drosophila)                                                    | 454.8       | 1.487        | 3.49 |
| Sost                                       | sclerostin                                                                 | 255.5       | 1.458        | 2.67 |
| Wfikkn1                                    | WAP, FS, Ig, KU and NTR-containing protein 1                               | 80.18       | 1.555        | 1.8  |
| Edn1                                       | endothelin 1                                                               | 59.69       | 1.74         |      |
| Junb                                       | Jun-B oncogene                                                             | 56.07       | 1.45         | 3.56 |
| Zic1                                       | zinc finger protein of the cerebellum 1                                    | 103.7       | 0.548        | 0.68 |
| <b>neural development</b>                  |                                                                            |             |              |      |
| Scn9a                                      | sodium channel, voltage-gated, type IX, alpha                              | 13.57       | 4.089        | 5.62 |
| Snca                                       | synuclein, gamma                                                           | 113.8       | 3.038        |      |
| Stmn3                                      | stathmin-like 3                                                            | 119.9       | 2.771        |      |
| Stmn2                                      | stathmin-like 2                                                            | 110.9       | 2.156        | 2.75 |
| Nefm                                       | neurofilament, medium polypeptide                                          | 401.5       | 2.024        |      |
| Neurod1                                    | neurogenic differentiation 1                                               | 113.7       | 1.974        | 2.32 |
| Nefl                                       | neurofilament, light polypeptide                                           | 572.6       | 1.788        |      |
| Tubb1                                      | tubulin, beta 1                                                            | 107.2       | 1.724        |      |
| Ina                                        | internexin neuronal intermediate filament protein, alpha                   | 97.78       | 1.697        |      |
| Neurod4                                    | neurogenic differentiation 4                                               | 63.81       | 1.667        | 2.33 |
| Elavl4                                     | ELAV (embryonic lethal, abnormal vision, Drosophila)-like 4 (Hu antigen D) | 147.3       | 1.664        |      |
| Prtg                                       | protogenin homolog (Gallus gallus)                                         | 602.3       | 1.663        |      |
| Fabp7                                      | fatty acid binding protein 7, brain                                        | 386.5       | 2.114        | 3.65 |
| Nhlh2                                      | nescient helix loop helix 2                                                | 84.6        | 1.514        | 3.93 |
| <b>Osteogenesis</b>                        |                                                                            |             |              |      |
| Spp1                                       | secreted phosphoprotein 1                                                  | 99.57       | 1.831        |      |
| Junb                                       | Jun-B oncogene                                                             | 56.07       | 1.45         | 3.56 |
| Aspn                                       | asporin                                                                    | 90.61       | 0.656        |      |
| Sost                                       | sclerostin                                                                 | 255.5       | 1.458        | 2.67 |
| Lbxcor1                                    | ladybird homeobox 1 homolog (Drosophila) corepressor 1                     | 98.64       | 0.628        |      |
| Lect1                                      | leukocyte cell derived chemotaxin 1                                        | 90.35       | 0.625        |      |
| <b>Migration and cytoskeleton</b>          |                                                                            |             |              |      |
| Plek                                       | pleckstrin                                                                 | 67.86       | 1.586        | 2.5  |
| Fermt3                                     | fermitin family homolog 3 (Drosophila)                                     | 235.8       | 1.579        | 1.48 |
| Ly86                                       | lymphocyte antigen 86                                                      | 83.32       | 1.536        |      |
| Col9a3                                     | collagen, type IX, alpha 3                                                 | 105.3       | 0.634        | 0.3  |
| Limk1                                      |                                                                            | 63.22       | 0.618        |      |

|               |                                                                           |       |       |     |
|---------------|---------------------------------------------------------------------------|-------|-------|-----|
| Ilk           | integrin linked kinase                                                    | 805.1 | 0.531 |     |
| Lamb1-1       | laminin B1 subunit 1                                                      | 52.01 | 0.518 | 0.5 |
| St3gal4       | ST3 beta-galactoside alpha-2,3-sialyltransferase 4                        | 97.51 | 0.301 |     |
| <b>others</b> |                                                                           |       |       |     |
| Taf10         | TAF10 RNA polymerase II, TATA box binding protein (TBP)-associated factor | 83    | 2.879 |     |
| Skiv2l2       | superkiller viralicidic activity 2-like 2                                 | 198.3 | 1.573 |     |
| Atad5         | ATPase family, AAA domain containing 5                                    | 77.42 | 1.571 |     |
| Trim71        |                                                                           | 192.7 | 1.559 |     |
| Zhx1          | zinc fingers and homeoboxes 1                                             | 78.71 | 1.538 |     |
| Cuedc1        | CUE domain containing 1                                                   | 111.9 | 1.537 |     |
| Fnbp4         | formin binding protein 4                                                  | 82.42 | 1.504 |     |
| Pth           | parathyroid hormone                                                       | 155.7 | 0.391 |     |
| Afp           | alpha fetoprotein                                                         | 80.15 | 0.311 |     |

Note: The expression data were normalized and differential expression was defined based on a cutoff of 1.5 fold change (FC) with a  $p$  value  $\leq 0.05$ .
